# Supplementary material
Source: HighWire-hosted journal article supplement (https://erj.ersjournals.com/content/58/3/2004522)
Supplement: inline-supplementary-material-1 [file inline-supplementary-material-1.pdf]

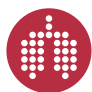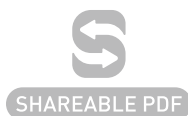

# A single blood eosinophil count measurement is as good as two for prediction of ICS treatment response in the IMPACT trial

Mona Bafadhel<sup>1</sup>, Neil Barnes<sup>2,3</sup>, Stephen C. Bourke<sup>4</sup>, Chris Compton<sup>2</sup>, Gerard J. Criner<sup>5</sup>, Mark T. Dransfield<sup>6</sup>, David M.G. Halpin<sup>7</sup>, MeiLan K. Han<sup>8</sup>, Benjamin Hartley<sup>9</sup>, C. Elaine Jones<sup>10</sup>, Peter Lange<sup>11,12</sup>, Sally Lettis<sup>13</sup>, David A. Lipson<sup>14,15</sup>, David A. Lomas<sup>16</sup>, Neil Martin<sup>2,17</sup>, Fernando J. Martinez<sup>18</sup>, Robert Wise<sup>19</sup> and Dave Singh<sup>20</sup>

<sup>1</sup>Nuffield Dept of Medicine, University of Oxford, Oxford, UK. <sup>2</sup>GSK, Brentford, UK. <sup>3</sup>Barts and the London School of Medicine and Dentistry, London, UK. <sup>4</sup>North Tyneside General Hospital, North Shields, and Newcastle University, Newcastle, UK. <sup>5</sup>Lewis Katz School of Medicine at Temple University, Philadelphia, PA, USA. <sup>6</sup>Division of Pulmonary, Allergy, and Critical Care Medicine, Lung Health Center, University of Alabama at Birmingham, Birmingham, AL, USA. <sup>7</sup>University of Exeter Medical School, College of Medicine and Health, University of Exeter, Exeter, UK. <sup>8</sup>University of Michigan, Pulmonary and Critical Care, Ann Arbor, MI, USA. <sup>9</sup>Veramed Ltd, Twickenham, UK. <sup>10</sup>GSK, Research Triangle Park, NC, USA. <sup>11</sup>Dept of Public Health, University of Copenhagen, Copenhagen, Denmark. <sup>12</sup>Herlev-Gentofte Hospital, Herlev, Denmark. <sup>13</sup>GSK, Uxbridge, UK. <sup>14</sup>GSK, Collegeville, PA, USA. <sup>15</sup>Pulmonary, Allergy, and Critical Care Division, Perelman School of Medicine, University of Pennsylvania, Philadelphia, PA, USA. <sup>16</sup>UCL Respiratory, University College London, London, UK. <sup>17</sup>University of Leicester, Leicester, UK. <sup>18</sup>New York-Presbyterian Hospital/Weill Cornell Medical Center, New York, NY, USA. <sup>19</sup>Division of Pulmonary and Critical Care Medicine, Johns Hopkins Medicine, Baltimore, MD, USA. <sup>20</sup>University of Manchester, Manchester, UK.

Mona Bafadhel ([mona.bafadhel@ndm.ox.ac.uk](mailto:mona.bafadhel@ndm.ox.ac.uk))

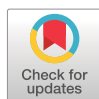

Shareable abstract (@ERSpublications)

**This *post hoc* analysis of the IMPACT trial demonstrated that a single blood eosinophil count measurement is sufficient to predict a beneficial response to inhaled corticosteroids in patients with symptomatic COPD and a history of exacerbations** <https://bit.ly/3wgeDCU>

**Cite this article as:** Bafadhel M, Barnes N, Bourke SC, *et al.* A single blood eosinophil count measurement is as good as two for prediction of ICS treatment response in the IMPACT trial. *Eur Respir J* 2021; 58: 2004522 [DOI: 10.1183/13993003.04522-2020].

This single-page version can be shared freely online.

Copyright ©The authors 2021. For reproduction rights and permissions contact [permissions@ersnet.org](mailto:permissions@ersnet.org)

Received: 22 Dec 2020  
Accepted: 12 May 2021

*To the Editor:*

Blood eosinophil count is a readily available biomarker in COPD that can assist identification of patients most likely to benefit from inhaled corticosteroids (ICS) [1]. Recent evidence has demonstrated a link between blood eosinophil count as a continuous variable and magnitude of response to ICS in terms of exacerbation rate reduction [2, 3]. The current Global Initiative for Chronic Obstructive Lung Disease (GOLD) report recommends that blood eosinophil count can be used to predict the likelihood of beneficial response to ICS, in combination with clinical assessment of exacerbation risk [1]. However, as blood eosinophil counts can show variability, particularly at higher levels [4–6], it is of clinical interest to determine how many measurements are sufficient to predict an ICS response in patients with COPD. Data from the InforMing the PATHway of COPD Treatment (IMPACT) trial showed an association between blood eosinophil count and ICS response on reduction of moderate/severe COPD exacerbations [3]. This *post hoc* analysis of IMPACT compared whether one or two measurements of blood eosinophil count can better predict ICS responses in patients with COPD.
